# Supplementary material
Source: publisher figshare collection journal article supplement (https://acs.figshare.com/ndownloader/files/4344934)
Supplement: Supplementary file 1 [file 4344934]

## Supplementary Material (ESI)

# Homochiral Nickel Coordination Polymers Based on Salen(Ni) Metalloligands: Synthesis, Structure and Catalytic Alkene Epoxidation

Yuanbiao Huang, Tianfu Liu, Jingxiang Lin, Jian Lü, Zujin Lin, Rong Cao\*

*State Key Laboratory of Structural Chemistry, Fujian Institute of Research on the Structure of Matter, The Chinese Academy of Science, Fuzhou 350002, China. E-mail: rcao@fjirsm.ac.cn; Fax: +86 59183796710; Tel: +86 059183796710*

### Table of Content

#### 1. General explanation.

#### 2. Synthesis of 1S and 2S.

#### 3. Table S1. Selected Bond length (Å) and angles (°) for 1S, 2R and 2S

#### 4. Figure S1. Asymmetric unit of crystal structures of 1S, 2R and 2S.

#### 5. Figure S2. A view of chirality molecules in the left-handed (a) and right-handed helix polymeric chain of 2R.

#### 6. Figure S3. A view of right-handed (a) and left-handed (b) helix polymeric chains in 2S.

#### 7. Figure S4. Intermolecular $\pi$ - $\pi$ interaction between 2R.

#### 8. Figure S5. The weak hydrogen bonds in the crystal structure of 2R.

#### 9. Figure S6. A view of 3D structure of 2R along the *b*-axis.

#### 10. Figure S7. Powder XRD patterns of 2R and 2S.

#### 11. Figure S8. Solid-state UV-Visible absorption spectra of ligand *RR*-H<sub>2</sub>L and compounds 1R and 2R.

#### 12. Figure S9. TGA of compound 2R.

#### 13. Figure S10. PXRD patterns of compound 2R before and after removal of the solvent.

#### 14. Figure S11. IR of compounds 1R and 2R before and after the first catalysis cycle.

#### 15. Figure S12. Cyclic voltammograms of 1R and 2R.

**16. Figure S13.** PXRD patterns of compound **2R** before and after the first catalysis cycle.

**17. Scheme S1.** Syntheses of ligand *RR*-H<sub>2</sub>L and *SS*-H<sub>2</sub>L.

**18. Figure S14.** PXRD patterns of compound **6**.

## 1. General explanation

Although PLATON suggests *Pnna* space group for **2R** and **2S** (because the chirality is centered at only two carbon atoms and all heavy scatterers in the unit cell are achiral), the mode of cyclohexyl group is not correct if the *Pnna* is used. And the absolute structure configuration of the homochiral compounds **2R** and **2S** have been further confirmed with the CD spectra. The phenomenon has been found in other homochiral crystals based on the salen ligands (Jeon, Y.; Heo, J.; Mirkin, C. A.; *J. Am. Chem. Soc.* **2007**, *129*, 7480-7481; Li, G.; Yu, W.; Ni, J.; Liu, T.; Liu, Y.; Sheng, E.; Cui, Y. *Angew. Chem. Int. Ed.* **2008**, *47*, 1245–1249; Li, G.; Yu, W.; Cui, Y. *J. Am. Chem. Soc.* **2008**, *130*, 4582-4583; Li, G.; Zhu, C.; Xi, X.; Cui, Y. *Chem. Commun.* **2009**, 2118–2120 ).

Because of the poorer epoxide yields than the Jacobsen catalyst (Salen(MnCl)), we could not determine the *ee* values of the obtained epoxides.

**2. Synthesis of complex SS-NiL (1S):** The synthesis procedure was similar to that of the complex **1R** except using *SS*-H<sub>2</sub>L. The orange crystal of **1S** was grown from the mixture solvent DMF/CH<sub>2</sub>Cl<sub>2</sub> (4:3). Anal. Calc. For complex **1S**, C<sub>82</sub>H<sub>98</sub>N<sub>10</sub>O<sub>6</sub>Ni<sub>2</sub>: C, 68.52; H, 6.82; N, 9.75. Found: C, 68.49; H, 6.86; N, 9.79%. IR (KBr, cm<sup>-1</sup>): 3698 (w), 2949 (m), 2909 (w), 2867 (w), 1678 (w), 1597 (s), 1550 (m), 1532 (w), 1439 (m), 1427 (w), 1411 (m), 1389 (m), 1347 (m), 1324 (w), 1302 (w), 1281 (m), 1264 (w), 1223 (m), 1204 (w), 1174 (m), 1087 (w), 1025 (w), 990 (w), 900 (w), 854 (w), 834 (m), 775 (m), 650 (m).

**Synthesis of coordination polymer 2S:** The synthesis procedure was similar to that of **2R** except using (*SS*-H<sub>2</sub>L) or **1S**. Yield: 63.8 % (based on Ni). Anal. Calc. for **2S**, C<sub>93</sub>H<sub>99</sub>N<sub>9</sub>O<sub>9</sub>Ni<sub>3</sub>: C, 67.17; H,

6.00; N, 7.58. Found: C, 67.10; H, 6.02; N, 7.61%. IR (KBr, cm<sup>-1</sup>): 3387 (b), 3069 (w), 3025 (w), 2949 (m), 2865 (w), 1679 (s), 1597 (s), 1551 (m), 1433 (s), 1406 (m), 1385 (m), 1347 (m), 1324 (m), 1281 (m), 1223 (m), 1174 (m) , 1087 (m), 1051 (w), 1025 (w), 991 (w), 899 (w), 834 (w), 820 (w), 787 (w), 650 (m), 575 (w).

**Table S1.** Selected Bond length (Å) and angles (°) for **1S**, **2R** and **2S**

|                   | <b>1S</b>  | <b>2R</b>  | <b>2S</b>  |
|-------------------|------------|------------|------------|
| Ni(1)-N(2)        | 1.841(4)   | 1.845(3)   | 1.844(4)   |
| Ni(1)-N(3)        | 1.842(4)   | 1.856(3)   | 1.858(4)   |
| Ni(1)-O(1)        | 1.854(3)   | 1.849(3)   | 1.860(3)   |
| Ni(1)-O(2)        | 1.830(3)   | 1.852(3)   | 1.858(4)   |
| Ni(2)-N(6)        | 1.849(4)   | 1.860(3)   | 1.855(4)   |
| Ni(2)-N(7)        | 1.842(4)   | 1.834(3)   | 1.833(4)   |
| Ni(2)-O(3)        | 1.849(3)   | 1.861(3)   | 1.856(3)   |
| Ni(2)-O(4)        | 1.847(3)   | 1.842(3)   | 1.842(3)   |
| Ni(3)-N(1)        | -          | 2.044(3)   | 2.045(4)   |
| Ni(3)-O(8)        | -          | 2.189(3)   | 2.200(4)   |
| Ni(3)-O(7)        | -          | 2.061(3)   | 2.055(3)   |
| Ni(4)-N(5)        | -          | 2.058(3)   | 2.059(4)   |
| Ni(4)-O(5)        | -          | 2.193(3)   | 2.196(4)   |
| Ni(4)-O(6)        | -          | 2.040(3)   | 2.050(4)   |
| O(1)-Ni(1)-N(3)   | 93.96(17)  | 94.23(13)  | 94.29(16)  |
| O(2)-Ni(1)-N(3)   | 172.45(15) | 176.40(14) | 176.42(18) |
| N(1)-Ni(3)-N(1)#1 | -          | 90.15(18)  | 89.9(2)    |
| N(1)-Ni(3)-O(8)   | -          | 96.83(12)  | 96.65(15)  |

Symmetry transformations used to generate equivalent atoms: #1 (**2R**) -x+1, y, -z+1/2; (**2S**) -x+2, y, -z+3/2.

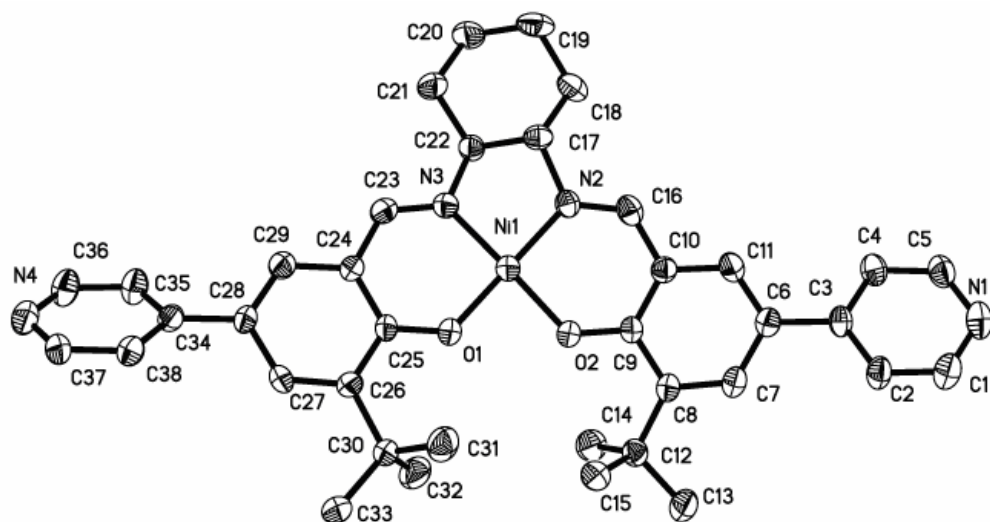

(a)

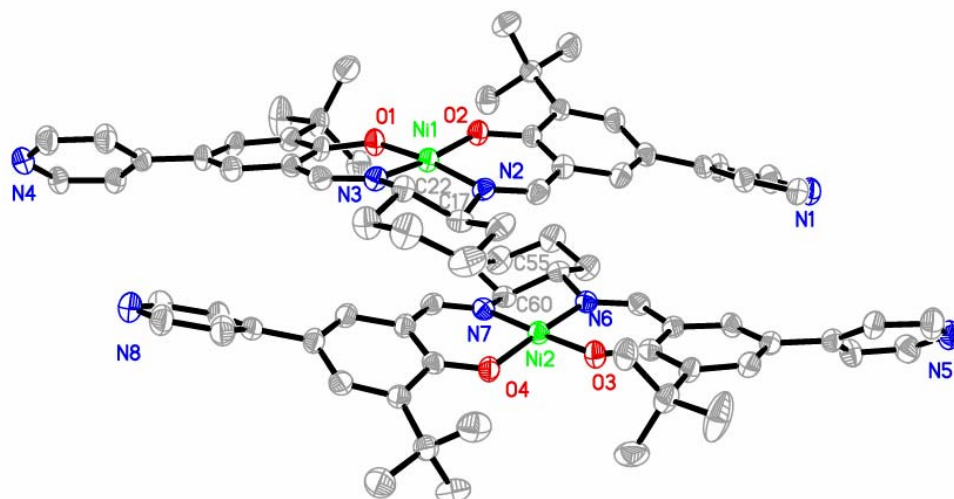

(b)

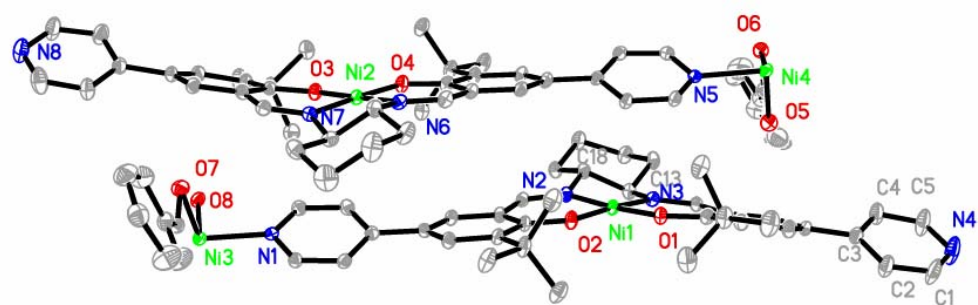

(c)

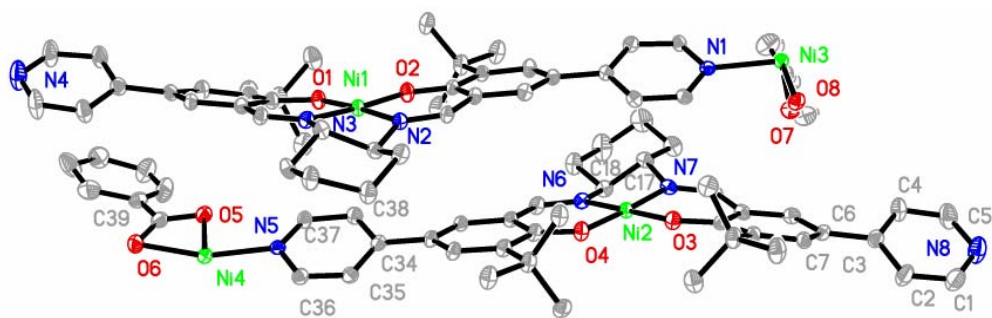

(d)

**Figure S1.** Asymmetric unit of crystal structures of **1S(a, b)**, **2R (c)** and **2S (d)**. Hydrogen atoms and solvent molecule DMF are omitted

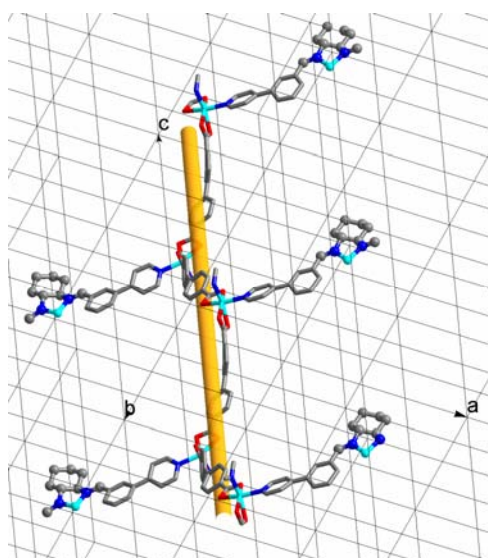

(a)

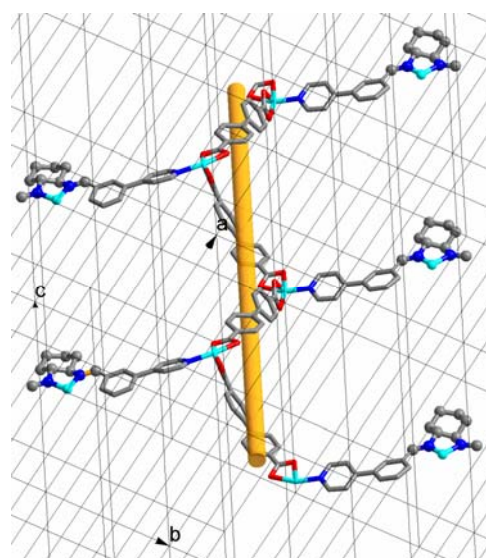

(b)

**Figure S2.** A view of chirality units in the left-handed (a) and right-handed helix polymeric chain of **2R**

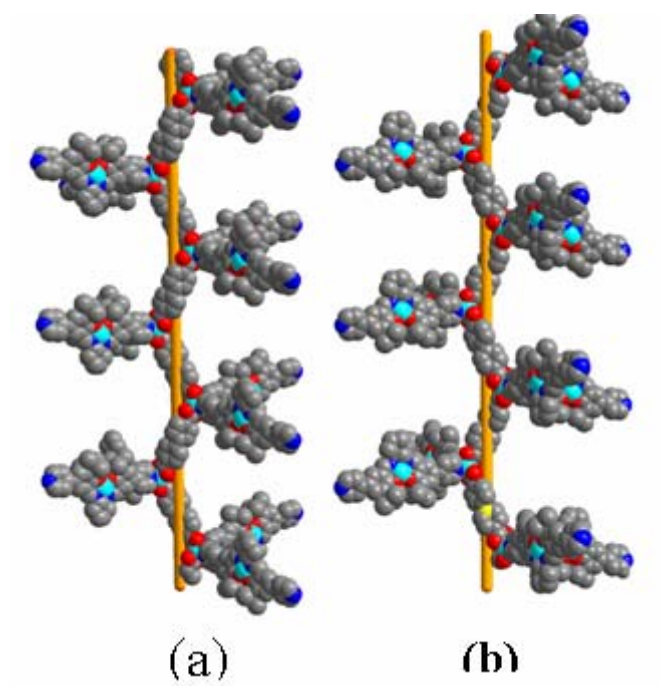

**Figure S3.** A view of right-handed (a) and left-handed (b) helix polymeric chains in **2S**

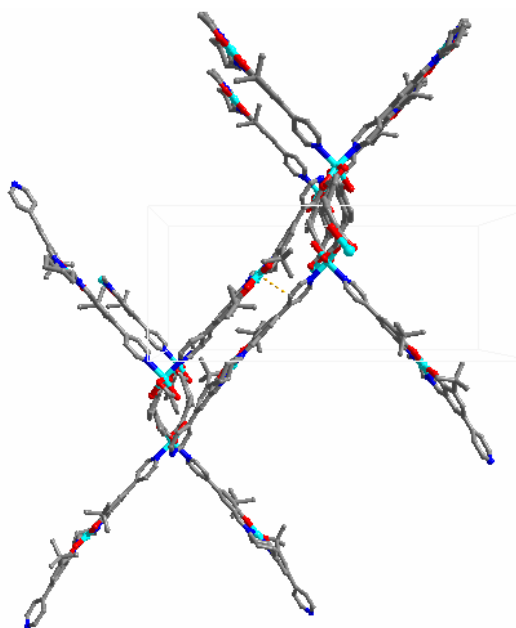

**Figure S4.** Intermolecular  $\pi$ - $\pi$  interaction between **2R**



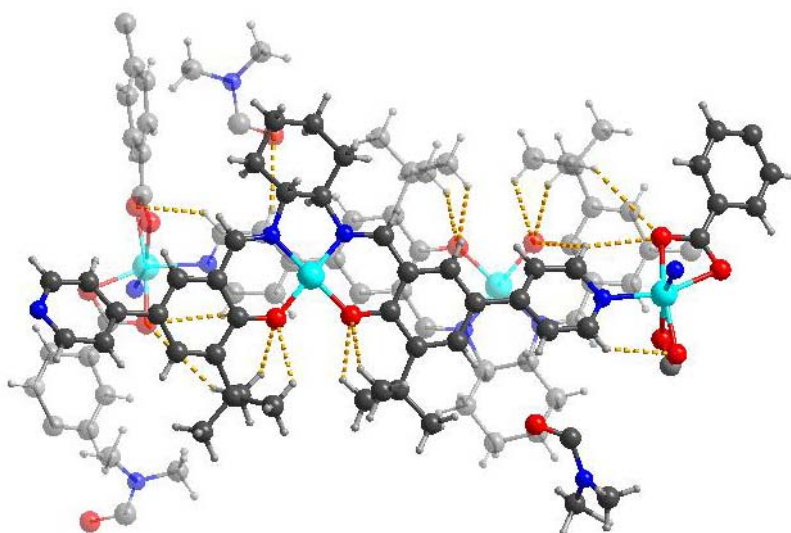

**Figure S5.** The weak hydrogen bonds in the crystal structure of **2R**

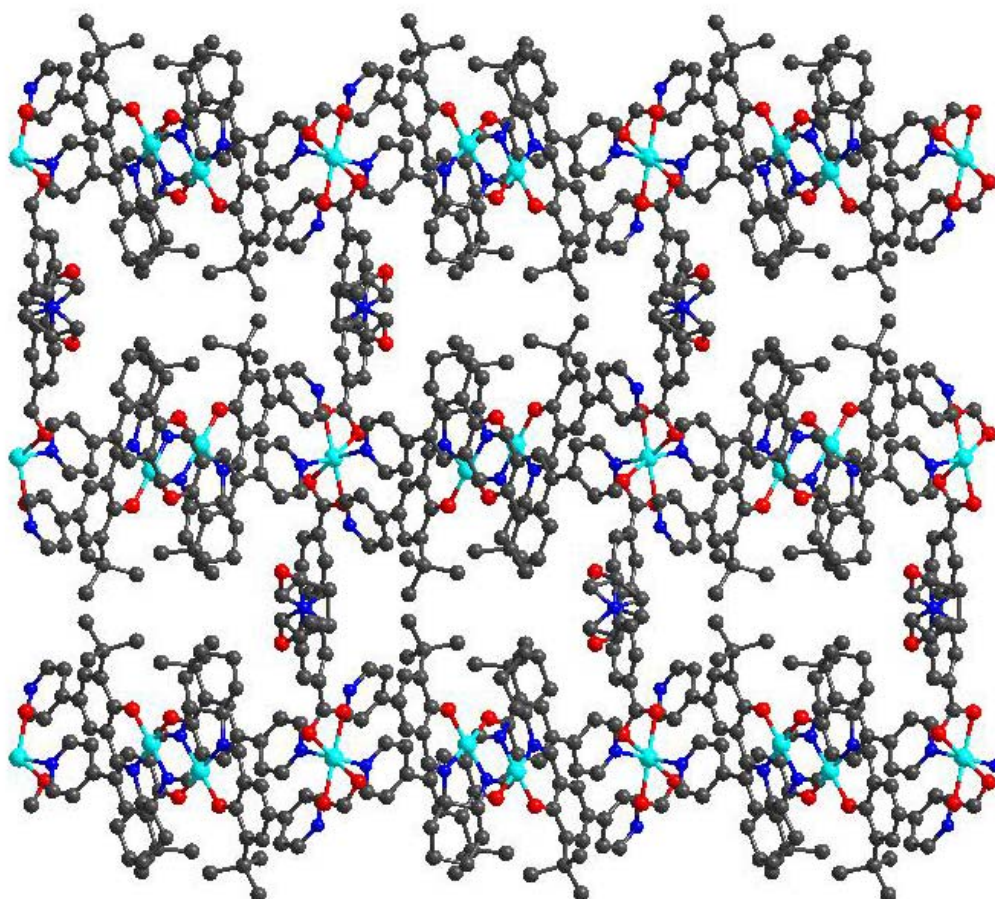

**Figure S6.** A view of 3D structure of **2R** along the *b*-axis

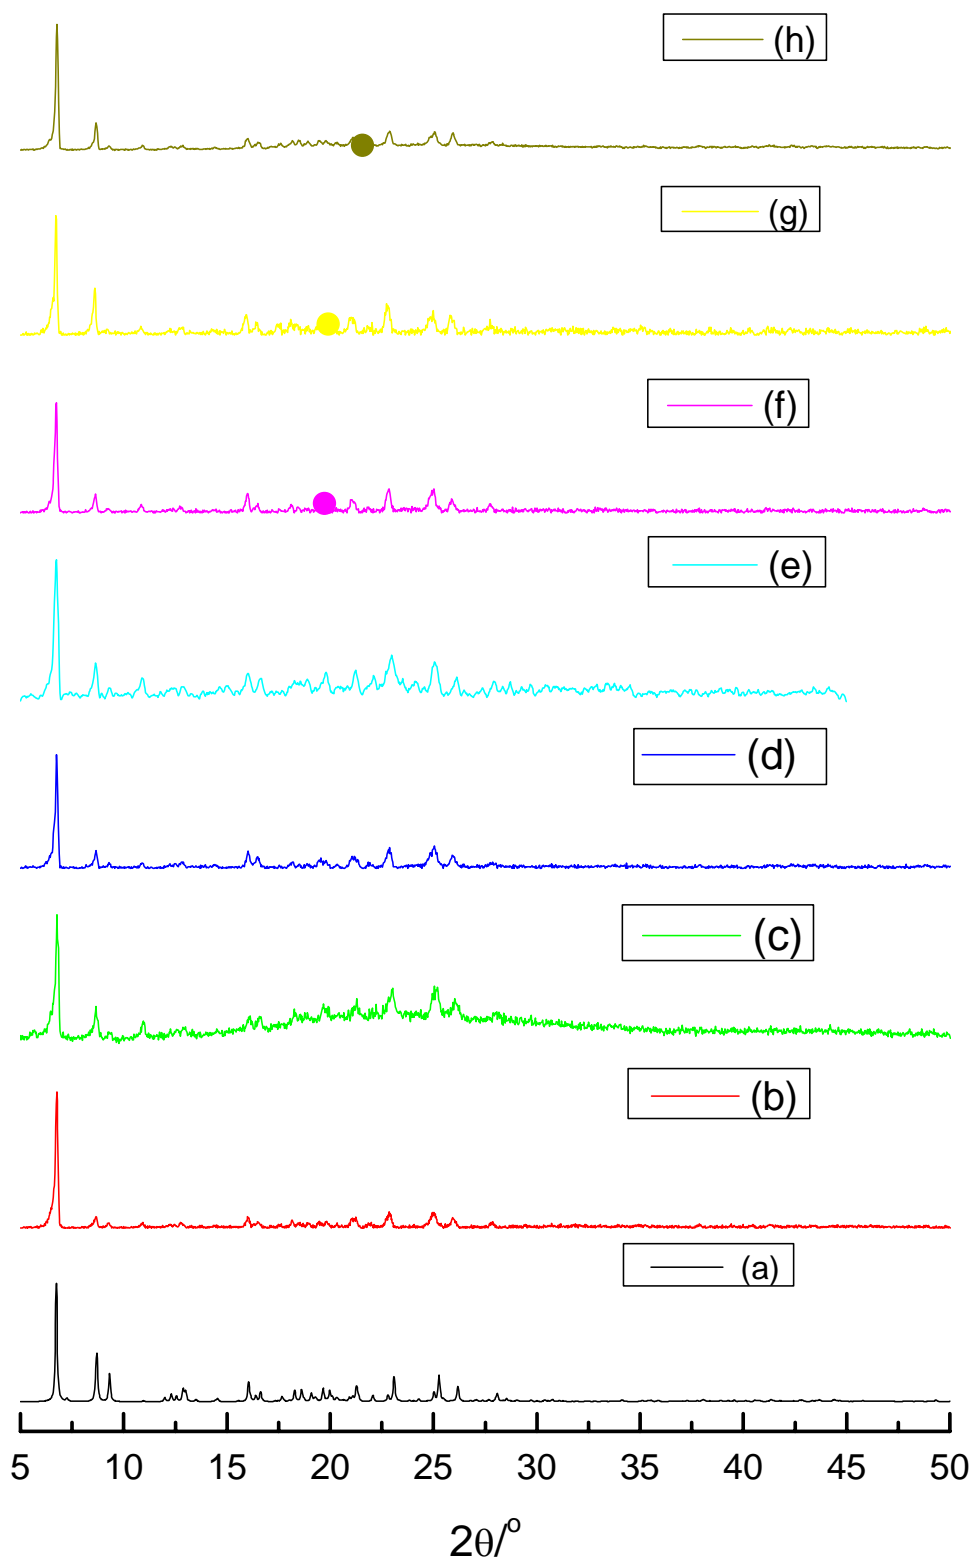

**Figure S7.** Powder XRD patterns of **2R** and **2S**: (a) simulated compound **2R**; (b) obtained from  $\text{Ni}(\text{NO}_3)_2 \cdot 6\text{H}_2\text{O}$  and  $RR\text{-H}_2\text{L}$  (2:1); (c) obtained from  $\text{Ni}(\text{NO}_3)_2 \cdot 6\text{H}_2\text{O}$  and  $RR\text{-H}_2\text{L}$  (3:1); (d) obtained from  $\text{Ni}(\text{NO}_3)_2 \cdot 6\text{H}_2\text{O}$  and  $RR\text{-H}_2\text{L}$  (4:1); (e) obtained from  $\text{NiCl}_2 \cdot 6\text{H}_2\text{O}$  and  $RR\text{-H}_2\text{L}$  (2:1); (f) obtained from  $\text{Ni}(\text{OAc})_2 \cdot 4\text{H}_2\text{O}$  and  $RR\text{-H}_2\text{L}$  (2:1); (g) obtained from  $\text{Ni}(\text{NO}_3)_2 \cdot 6\text{H}_2\text{O}$  and  $RR\text{-NiL}$  (1:1); (h)



compound **2S** obtained from  $\text{Ni}(\text{NO}_3)_2 \cdot 6\text{H}_2\text{O}$  and  $\text{SS-H}_2\text{L}$  (2:1).

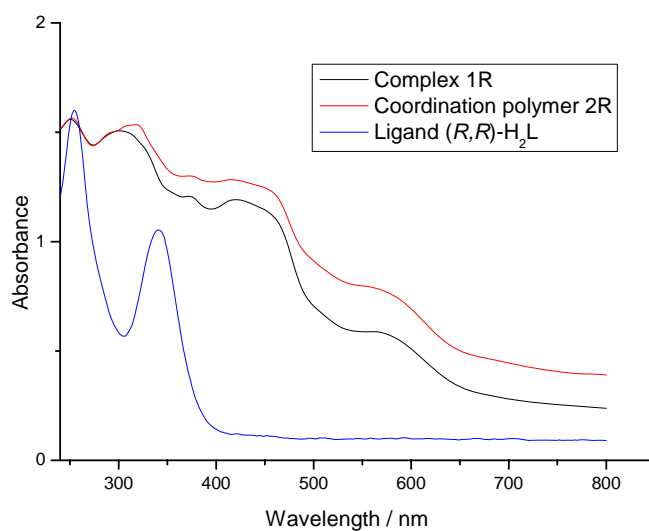

**Figure S8.** Solid-state UV-Visible absorption spectra of ligand (*R,R*)-H<sub>2</sub>L and compounds **1R** and **2R**.

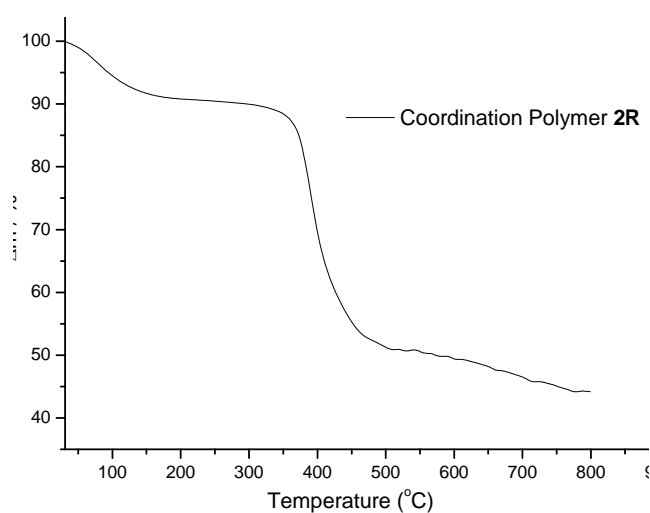

**Figure S9.** TGA of compound **2R**.

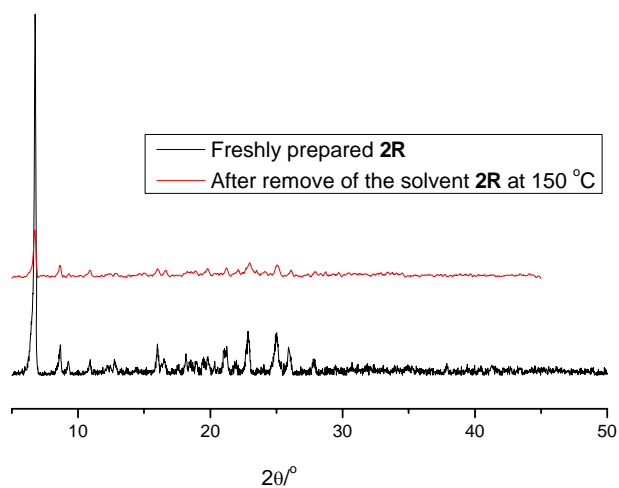

**Figure S10.** PXRD patterns of compound **2R** before and after removal of the solvent

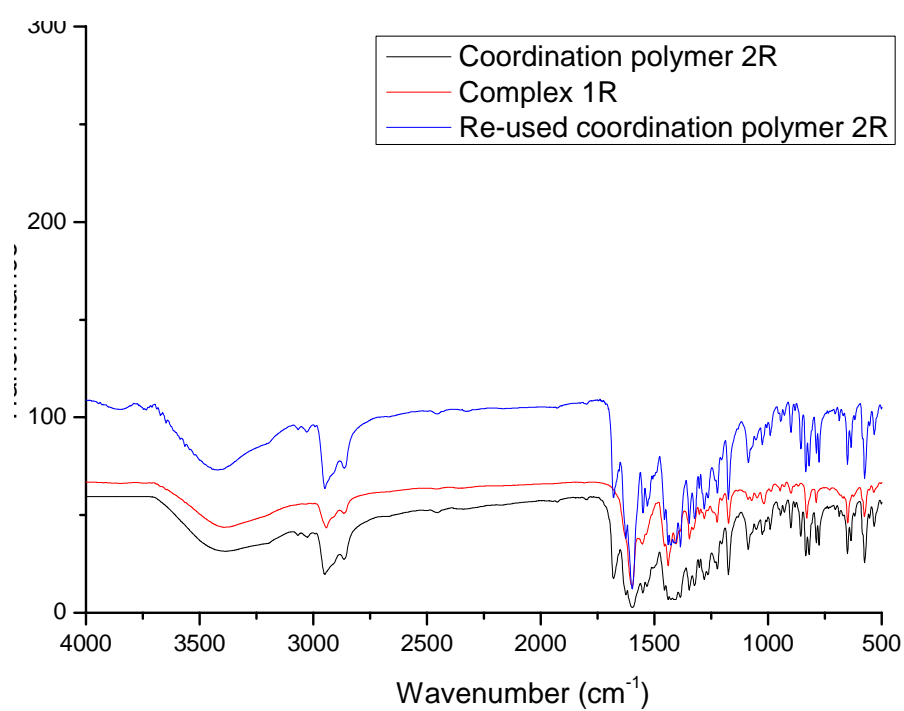

**Figure S11.** IR of compound **1R** and **2R** before and after the first catalysis cycle

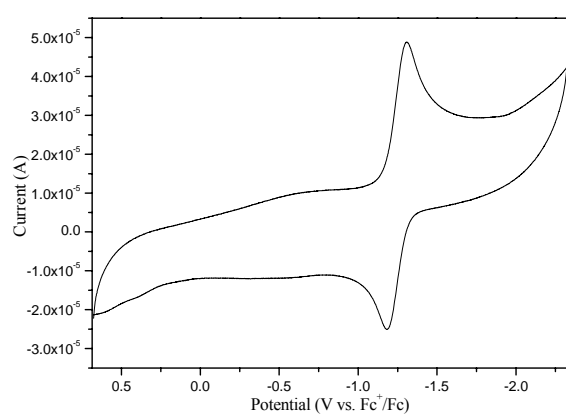

(a)

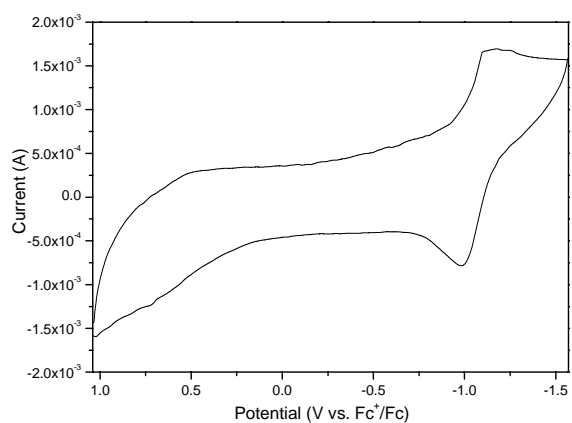

(b)

**Figure S12.** Cyclic voltammograms of **1R** (a) and **2R** (b) in anhydrous DMF (0.1 M  $N(n\text{-Bu})_4\text{ClO}_4$ ) at a scan rate of  $50 \text{ mV s}^{-1}$ .

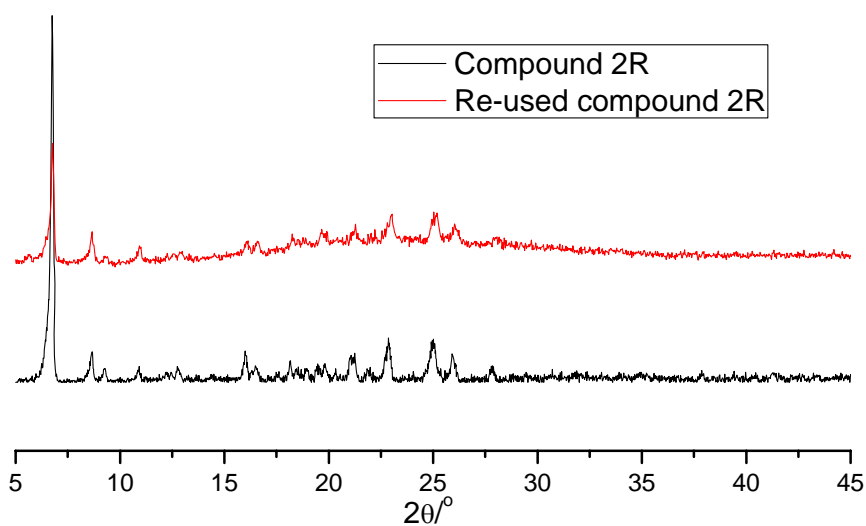

**Figure S13.** PXRD patterns of compound **2R** before and after the first catalysis cycle

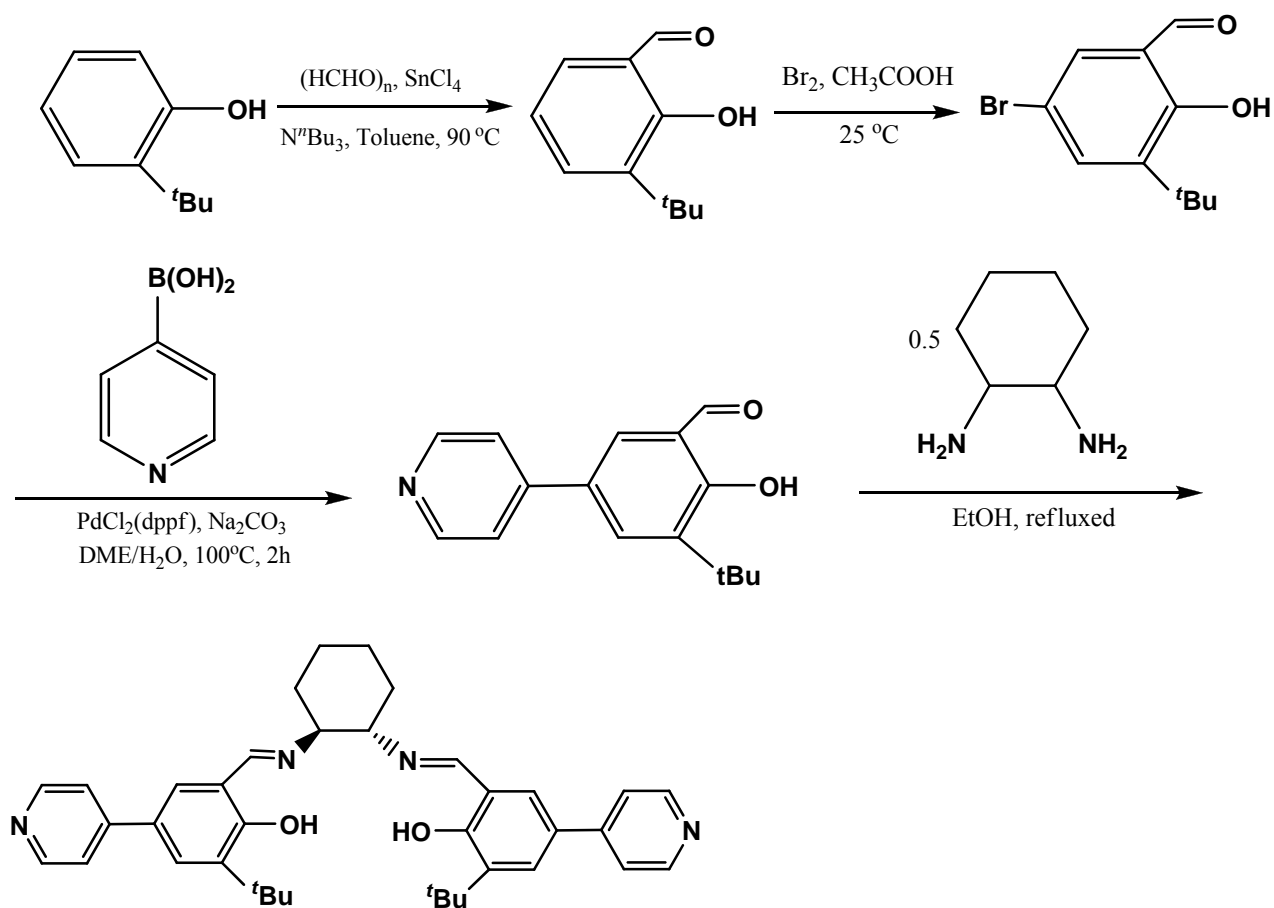

**Scheme S1.** Syntheses of ligand *RR*-H<sub>2</sub>L and *SS*-H<sub>2</sub>L

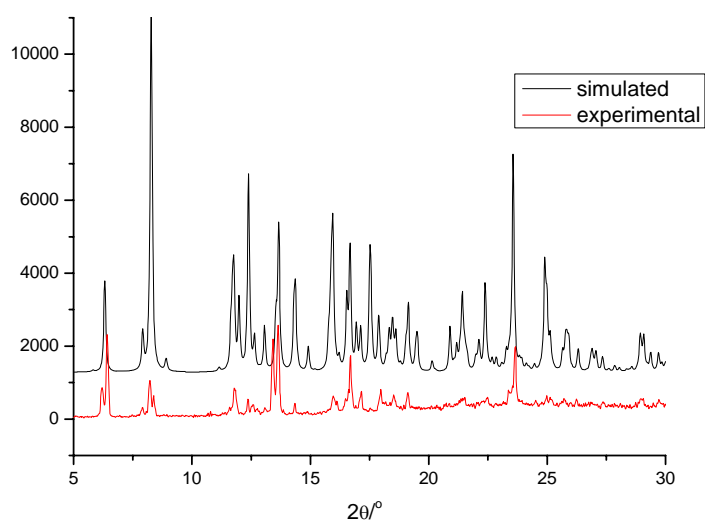

**Figure S14.** PXRD patterns of compound **6**
